# Supplementary material
Source: Springer Nature journal article supplement (https://www.springermedizin.de/resource/supplementary/12947_2014_534_MOESM4_ESM.pdf/9555972)

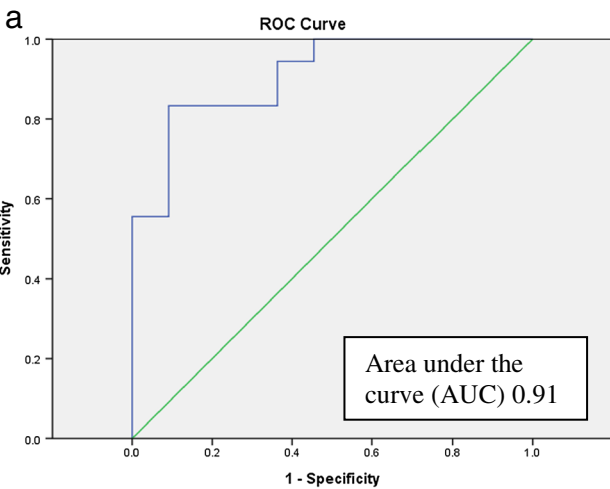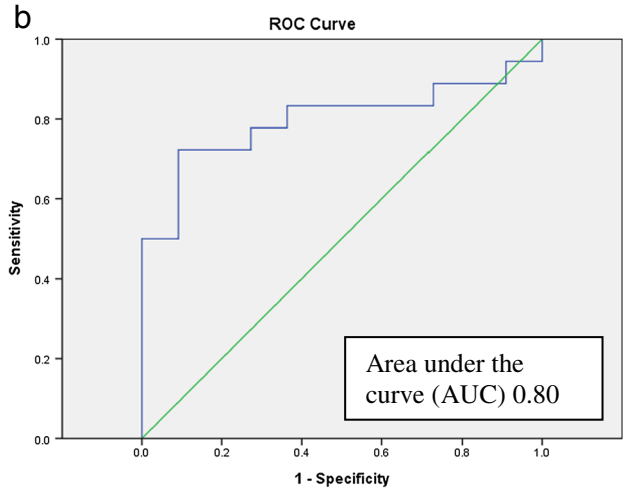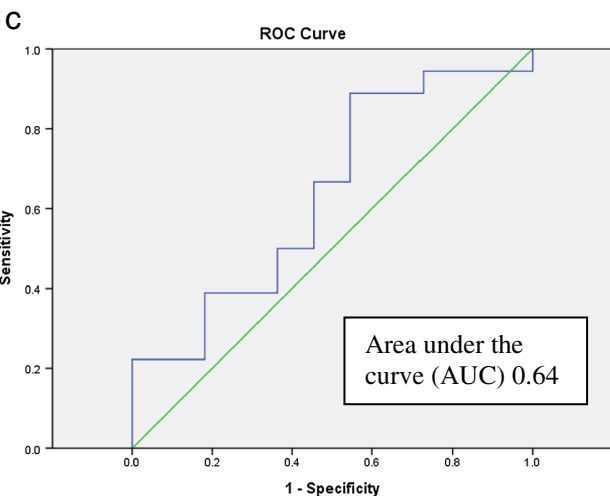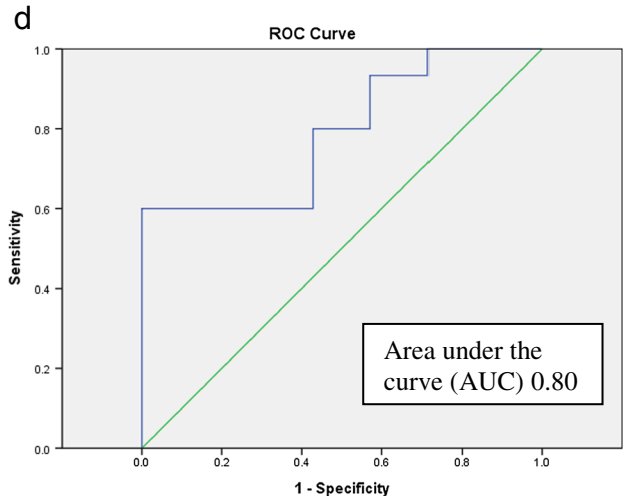

Supplement: MOESM4 [file 9555972]
